# Supplementary material for: Electrocatalysis for Oxygen Reduction Reaction on EDTAFeNa and Melamine co-Derived Self-Supported Fe-N-C Materials
Source: MDPI journal article supplement (doi:10.3390/catal11050623), 2021-05-12
Supplement: s1 [file s1]

## Electronic Supplementary Information

### Electrocatalysis for Oxygen Reduction Reaction on EDTAFeNa and Melamine co-Derived self-Supported Fe-N-C materials

Mengfan Shen<sup>1,3</sup>, Ziwei Meng<sup>3</sup>, Tong Xue<sup>2,3</sup>, Hongfang Shen<sup>3</sup>, Xiang-Hui Yan<sup>1,3\*</sup>

<sup>1</sup>Key Lab. of Powder Material & Advance Ceramics, North Minzu University, Yinchuan, Ningxia 750021, China

<sup>2</sup>International Scientific & Technological Cooperation Base of Industrial Waste Recycling and Advanced Materials, North Minzu University, Yinchuan, Ningxia 750021, China

<sup>3</sup>School of Materials Science and Engineering, North Minzu University, Yinchuan, Ningxia 750021, China

\*Correspondence: yanxianghui@tsinghua.org.cn; Tel.: +86-951-2067378.

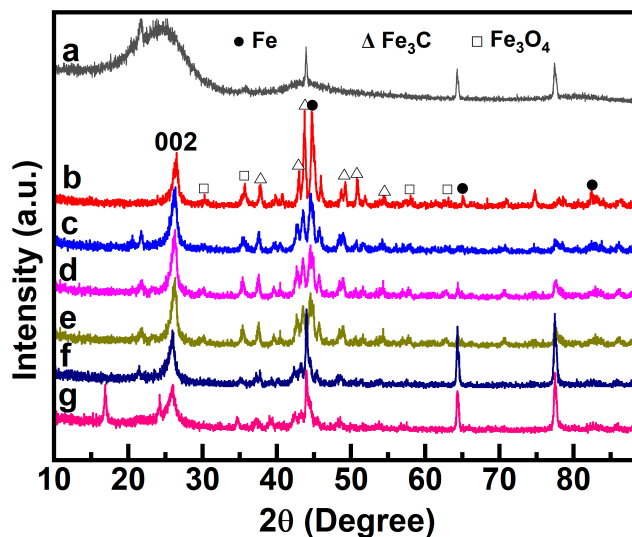

**Figure S1.** XRD patterns of the MA/EDTA-HT2 (a) and MA/EDTAFeNa-HT2 prepared under 0.5 h (b), 1 h (c) and 2 h (d) of acid-leaching time, and mass ratio of MA/EDTAFeNa of 2:4 (e), 3:4 (f) and 4:4 (g), respectively.

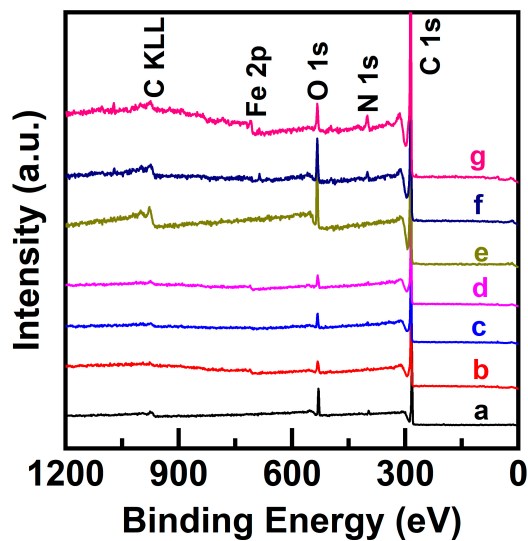

**Figure S2.** XPS survey spectra of the MA/EDTA-HT2 (a) and MA/EDTAFNa-HT2 prepared under 0.5 h (b), 1 h (c) and 2 h (d) of acid-leaching time, and mass ratio of MA/EDTAFNa of 2:4 (e), 3:4 (f) and 4:4 (g), respectively.

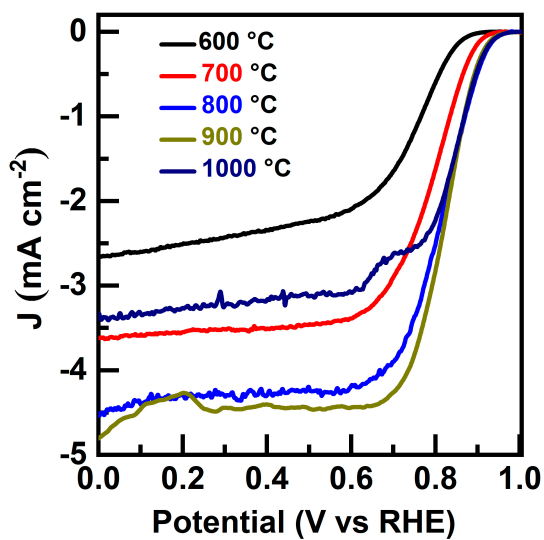

**Figure S3.** LSV curves for ORR on the MA/EDTAFNa-HT2 prepared under different pyrolysis temperature (HT2), respectively.

**Table S1.** Surface chemical compositions and atomic concentration of the series of MA/EDTAFcNa-HT2

| Sample                       | N   | C    | Fe  | O    |
|------------------------------|-----|------|-----|------|
|                              | at% |      |     |      |
| MA/EDTA-HT2                  | 1.5 | 88.0 | 0.0 | 10.3 |
|                              | 6   | 3    | 9   | 2    |
| MA/EDTAFcNa-HT2(AL0.5 h)     | 1.1 | 93.3 | 1.1 | 4.34 |
|                              | 3   | 9    | 5   |      |
| MA/EDTAFcNa-HT2(AL1 h)       | 0.7 | 94.3 | 0.2 | 4.65 |
|                              | 0   | 7    | 7   |      |
| MA/EDTAFcNa-HT2(AL2 h)       | 1.2 | 94.3 | 0.9 | 3.48 |
|                              | 3   | 5    | 4   |      |
| MA/EDTAFcNa-HT2(600 °C)      | 0.5 | 91.9 | 0.9 | 6.56 |
|                              | 6   | 6    | 2   |      |
| MA/EDTAFcNa-HT2(700 °C)      | 1.6 | 92.4 | 0.5 | 5.38 |
|                              | 0   | 3    | 9   |      |
| =0.56MA/EDTAFcNa-HT2(800 °C) | 1.1 | 93.9 | 0.7 | 4.15 |
|                              | 5   | 8    | 3   |      |
| MA/EDTAFcNa-HT2(1000 °C)     | 2.6 | 92.0 | 0.2 | 5.08 |
|                              | 7   | 0    | 4   |      |
| MA/EDTAFcNa-HT2(2:4)         | 1.4 | 84.9 | 0.5 | 13.1 |
|                              | 8   | 1    | 1   |      |
| MA/EDTAFcNa-HT2(3:4)         | 3.4 | 88.1 | 0.5 | 7.89 |
|                              | 1   | 7    | 3   |      |
| MA/EDTAFcNa-HT2(4:4)         | 4.4 | 89.8 | 1.0 | 4.72 |
|                              | 1   | 6    | 1   |      |

\* Determined by XPS elemental analysis

**Table S2.** Atomic concentration of varied N configurations in the series of MA/EDTAFcNa-HT2

| Sample                   | Pyridinic N | Pyrrolic N | Graphitic /quaternary N | Oxidized pyridinic N |
|--------------------------|-------------|------------|-------------------------|----------------------|
|                          | at%         |            |                         |                      |
| MA/EDTA-HT2              | 0.16        | 0          | 1.40                    | 0                    |
| MA/EDTAFcNa-HT2(AL0.5 h) | 0.16        | 0.64       | 0.12                    | 0.21                 |
| MA/EDTAFcNa-HT2(AL1 h)   | 0.11        | 0.39       | 0.08                    | 0.13                 |
| MA/EDTAFcNa-HT2(AL2 h)   | 0.19        | 0.33       | 0.20                    | 0.51                 |
| MA/EDTAFcNa-HT2(600 °C)  | 0.12        | 0.26       | 0.04                    | 0.13                 |
| MA/EDTAFcNa-HT2(700 °C)  | 0.29        | 0.72       | 0.34                    | 0.25                 |
| MA/EDTAFcNa-HT2(800 °C)  | 0.29        | 0.24       | 0.36                    | 0.26                 |

|                          |      |      |      |      |
|--------------------------|------|------|------|------|
| MA/EDTAFeNa-HT2(1000 °C) | 0.42 | 1.23 | 0.24 | 0.77 |
| MA/EDTAFeNa-HT2(2:4)     | 0.29 | 0.47 | 0.52 | 0.20 |
| MA/EDTAFeNa-HT2(3:4)     | 0.52 | 1.16 | 1.28 | 0.46 |
| MA/EDTAFeNa-HT2(4:4)     | 0.33 | 2.34 | 0.85 | 0.89 |

\* Determined by XPS elemental analysis

The number of transferred electrons and kinetic current density in the ORR can be calculated from Koutecky-Levich (K-L) equation [1,2]:

$$(1) J^{-1} = J_L^{-1} + J_k^{-1} = (B\omega^{1/2})^{-1} + J_k^{-1}$$

$$(2) B = 0.20 nFC_0(D_0)^{2/3}\nu^{-1/6}$$

$$(3) J_k = nFkC_0$$

where  $J$  is the measured current density,  $J_L$  and  $J_k$  is the diffusion-limiting and kinetic current density,  $\omega$  is the electrode rotation speed (rpm),  $n$  is the number of transferred electrons required on the average for the reduction of an oxygen molecule,  $F$  is the Faraday constant ( $F = 96485 \text{ C mol}^{-1}$ ),  $C_0$  and  $D_0$  are the bulk concentration and diffusion coefficient of  $\text{O}_2$  ( $C_0 = 1.2 \times 10^{-3} \text{ mol/L}$ ,  $D_0 = 1.9 \times 10^{-5} \text{ cm}^2 \text{ s}^{-1}$ ), respectively,  $\nu$  is the kinematic viscosity of the electrolyte ( $\nu = 0.01 \text{ cm}^2 \text{ s}^{-1}$ ), and  $k$  is the electron-transfer rate constant. According to equations (1) and (2), the  $n$  and  $J_k$  can be obtained from the slope and intercept of the Koutecky-Levich plots, respectively.

## References

- [1] Bard, A.J.; Faulkner, L.R. *Electrochemical methods: fundamentals and applications* 2nd edition, Wiley New York, **2000**.
- [2] Yang, S.B.; Feng, X.L.; Wang, X.C.; Müllen, K. Graphene-based carbon nitride nanosheets as efficient metal-free electrocatalysts for oxygen reduction reactions. *Angew. Chem. Int. Ed.* **2011**, 50: 5339-5343.
