# Supplementary material for: Electrocatalysis for Oxygen Reduction Reaction on EDTAFeNa and Melamine co-Derived Self-Supported Fe-N-C Materials
Source: MDPI journal article supplement (doi:10.3390/catal11050623), 2021-05-12
Supplement: s1 [file s1]

Archive with 1 entries (1 files):
- catalysts-1183895-supplementary.pdf
